# Supplementary material for: The Bradykinin-BDKRB1 Axis Regulates Aquaporin 4 Gene Expression and Consequential Migration and Invasion of Malignant Glioblastoma Cells via a Ca2+-MEK1-ERK1/2-NF-κB Mechanism
Source: PubMed Central journal article supplement (PMC7139930; doi:10.3390/cancers12030667), 2020-03-13

Fig. 2E

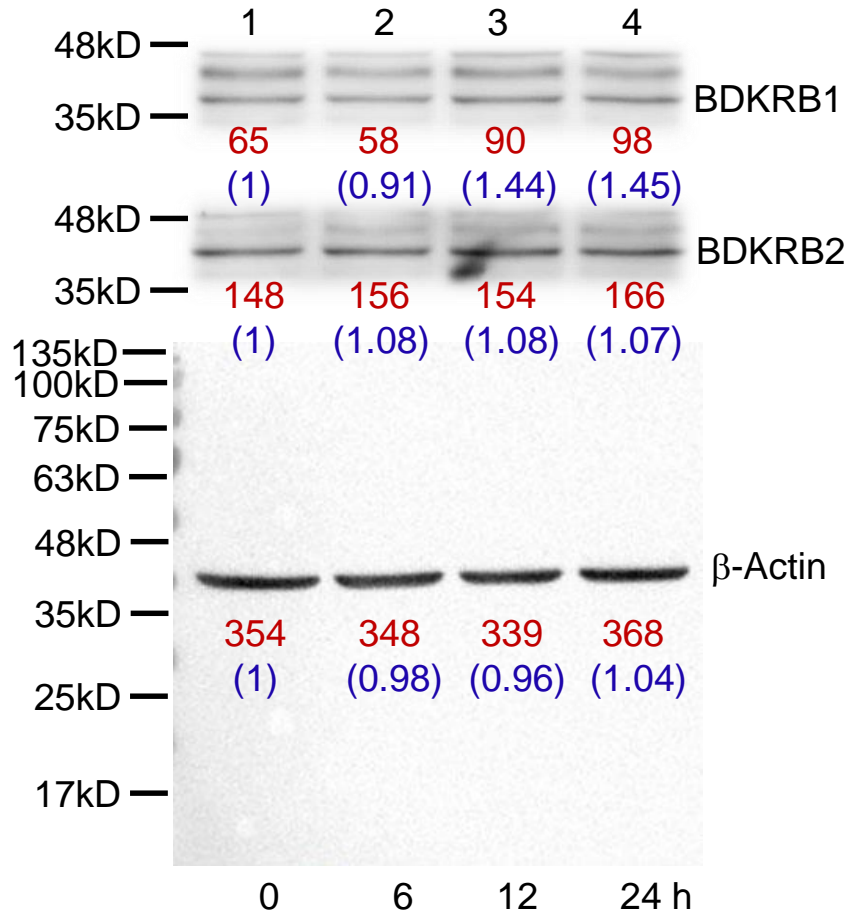

Fig. 3A

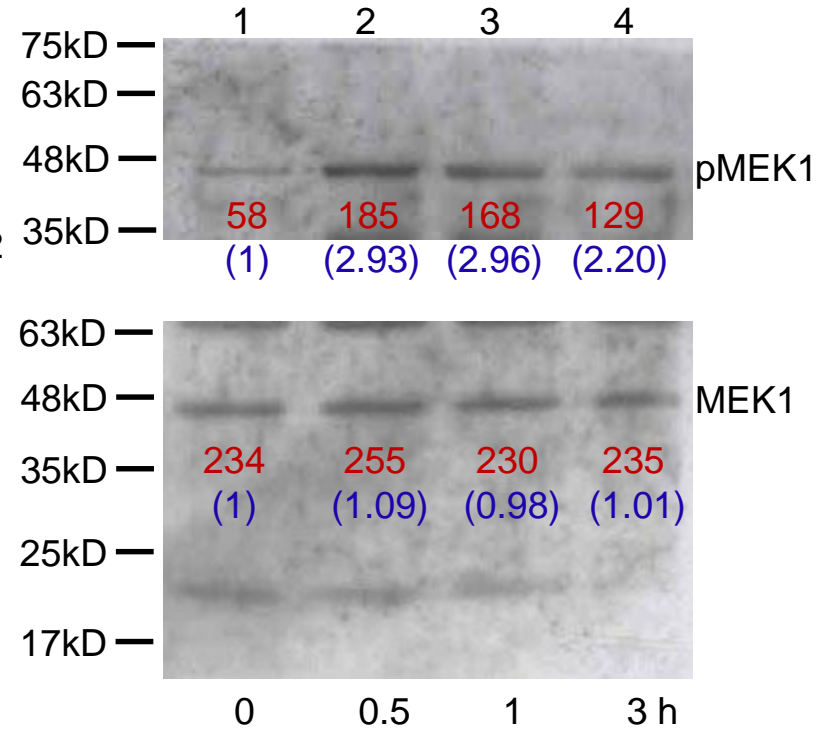

Fig. 3C

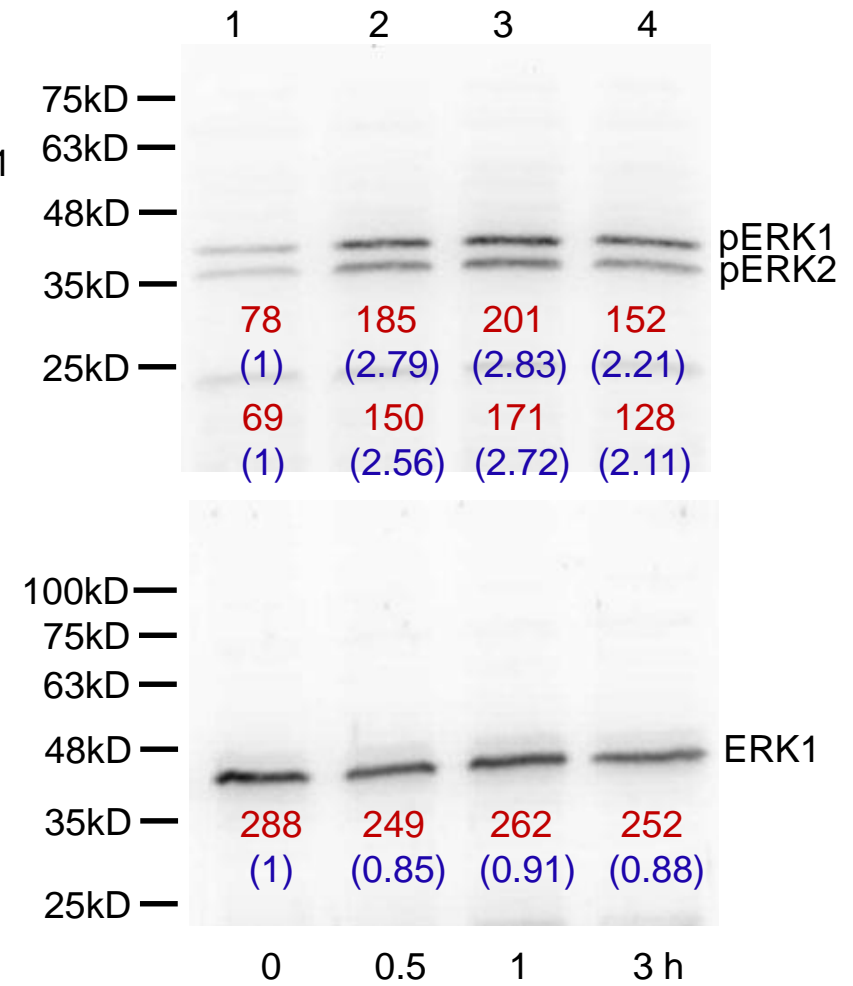

Fig. 4A

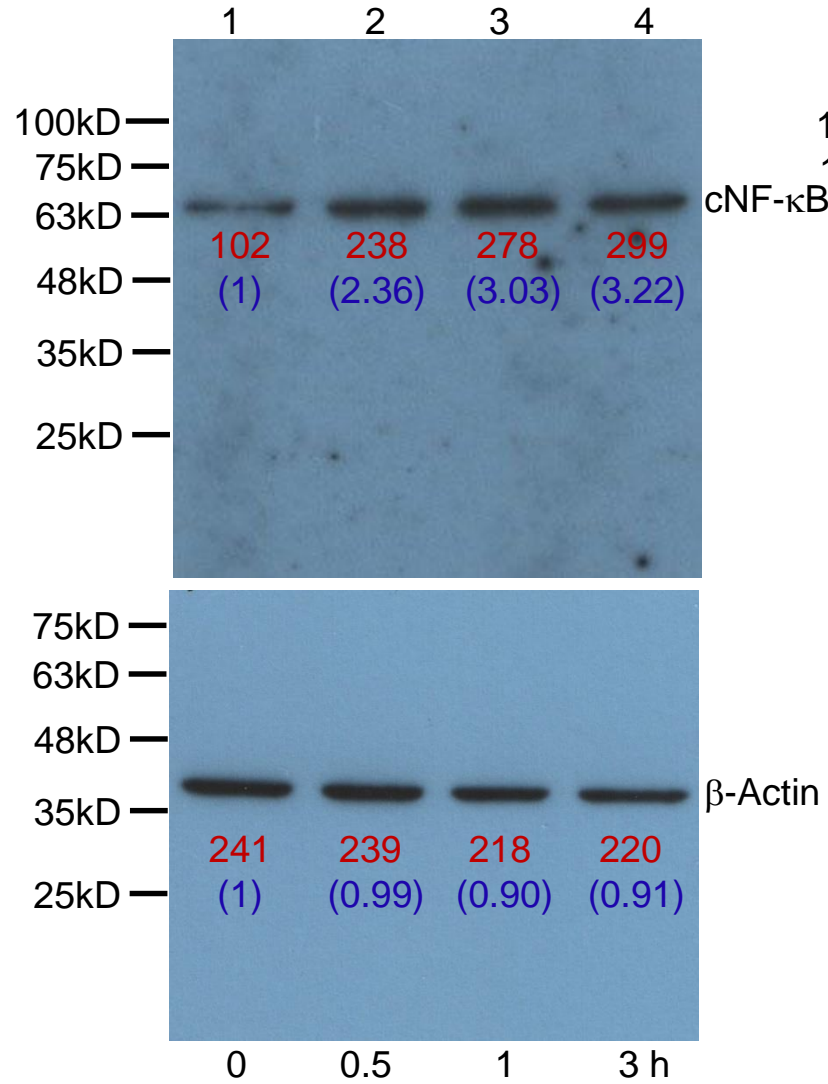

Fig. 4C

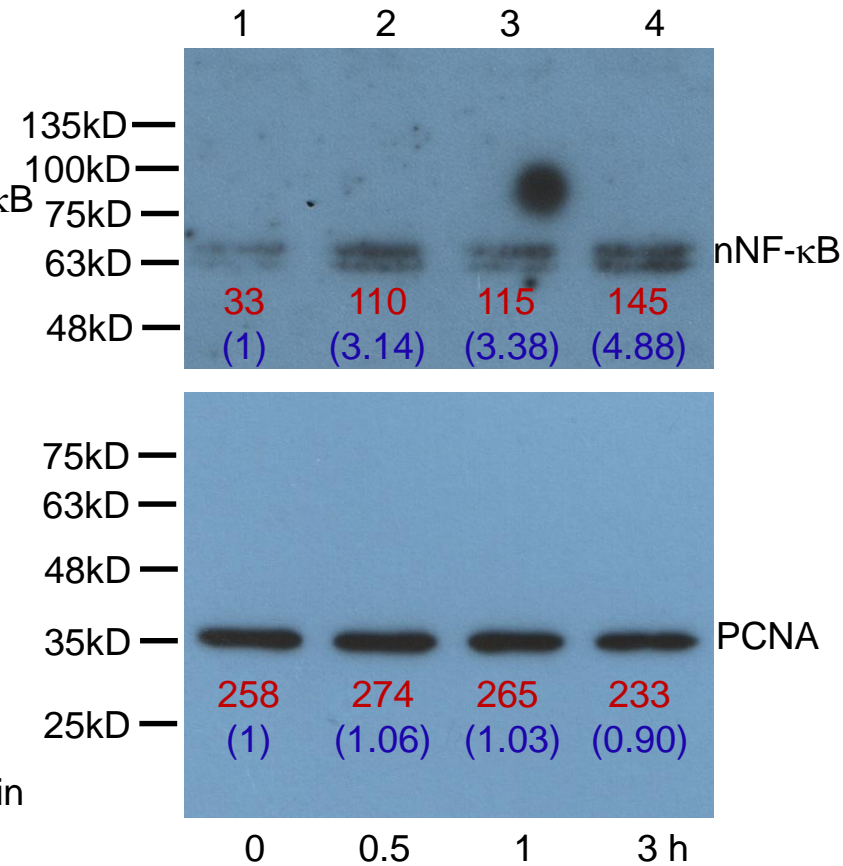

Fig. 5F

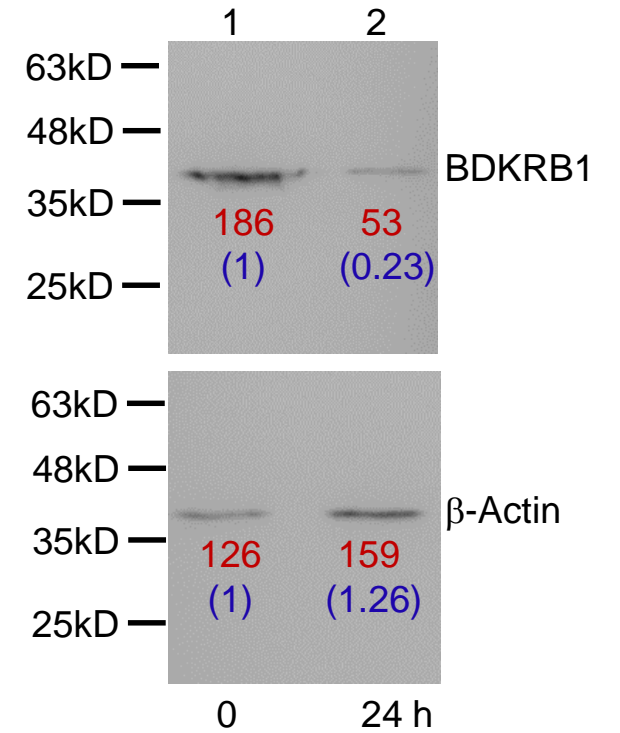

Supplement: cancers-12-00667-s001.pdf [file cancers-12-00667-s001.pdf]
